# Supplementary material for: Clinical pharmacokinetic properties of magnesium sulphate in women with pre‐eclampsia and eclampsia
Source: PubMed Central journal article supplement (PMC4737322; doi:10.1111/1471-0528.13753), 2015-11-24
Supplement: BJO-123-356-s002.pdf [file BJO-123-356-s002.pdf]

**Figure S2.1 4 g loading + 1g/hr continuous maintenance**

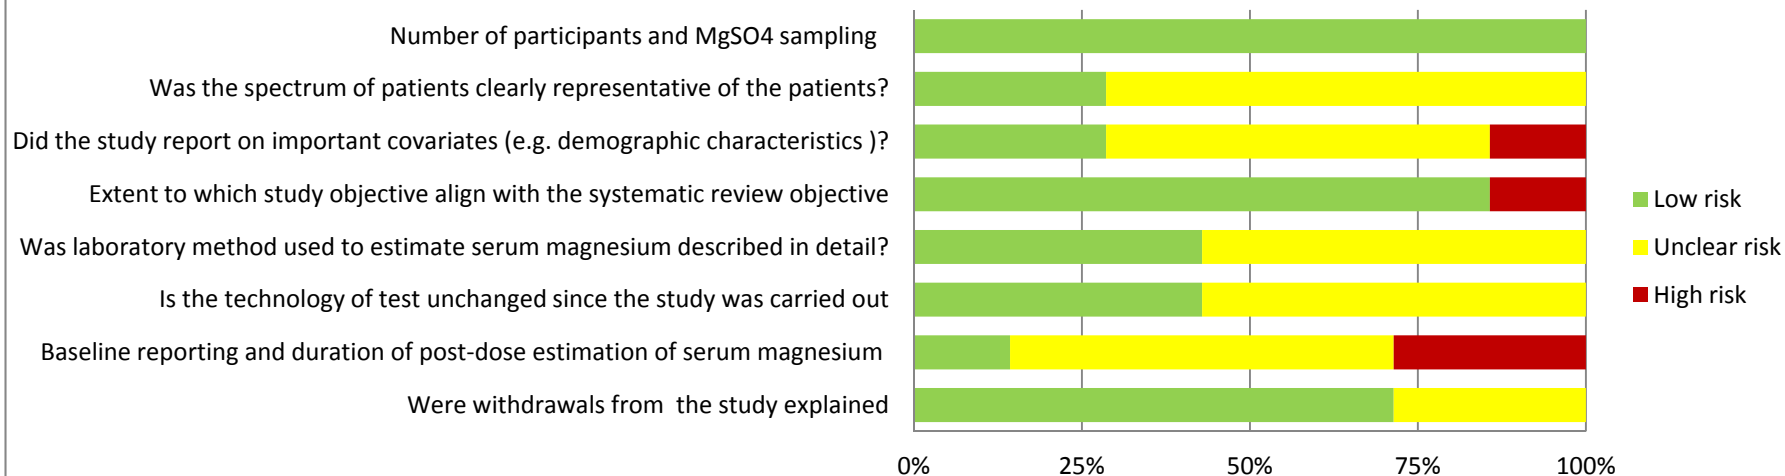

**Figure S2.2 4g loading + 2g/hr continuous maintenance**

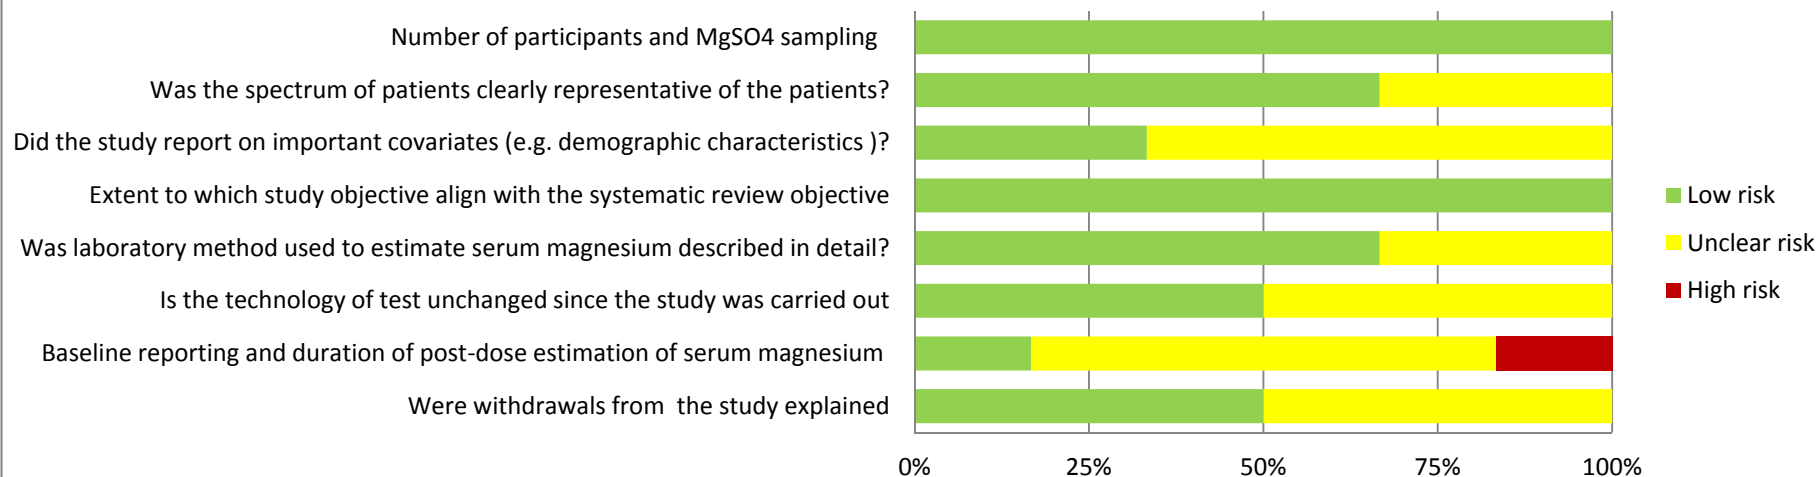

**Figure S2.3 5g loading + 1g/hr continuous maintenance**

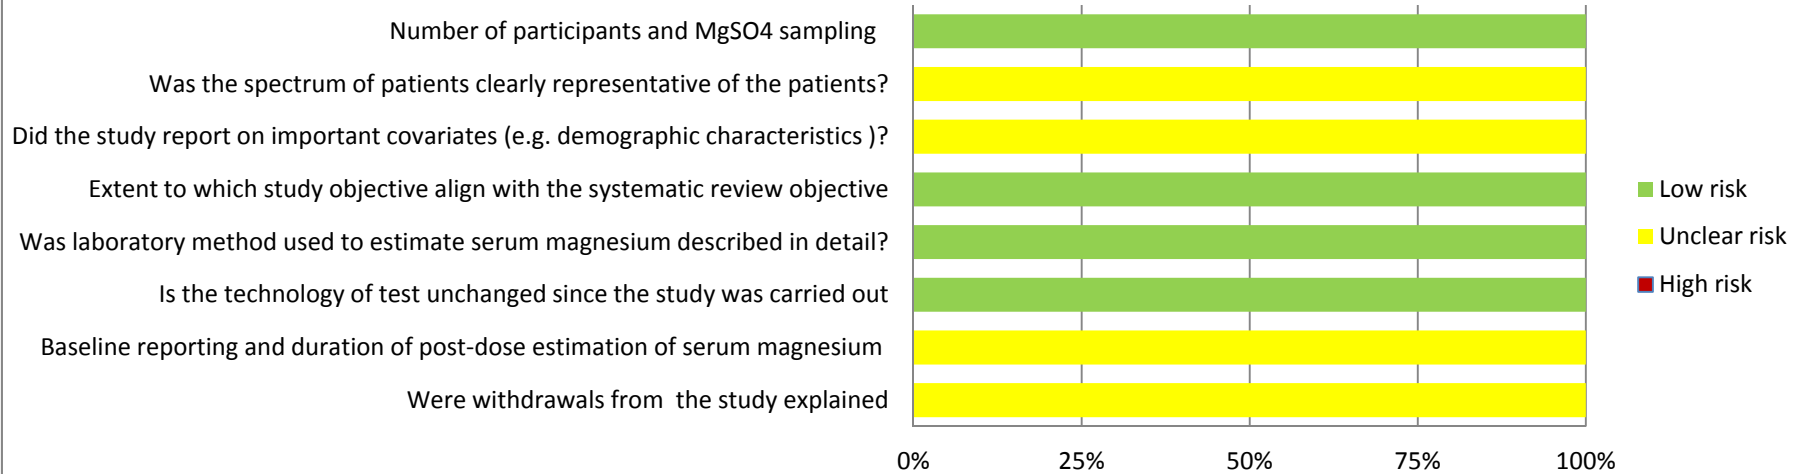

**Figure S2.4 6g loading + 2g/hr continuous maintenance**

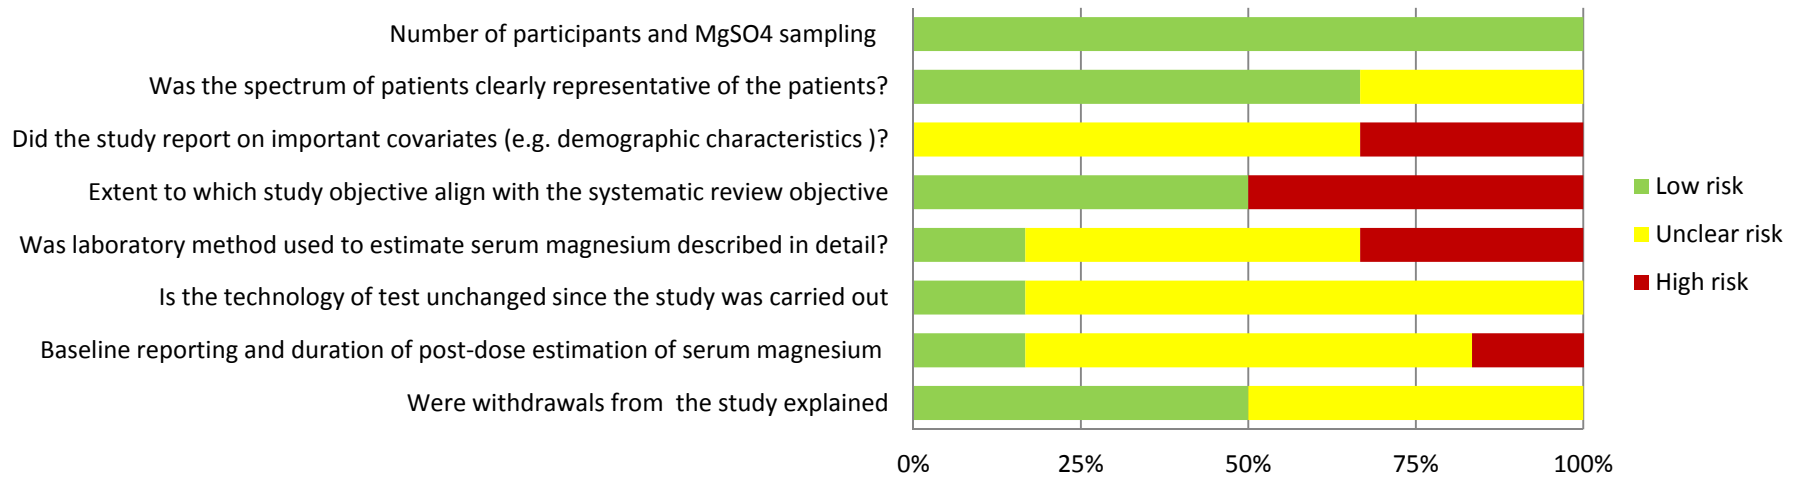

**Figure S2.5 Other regimens**

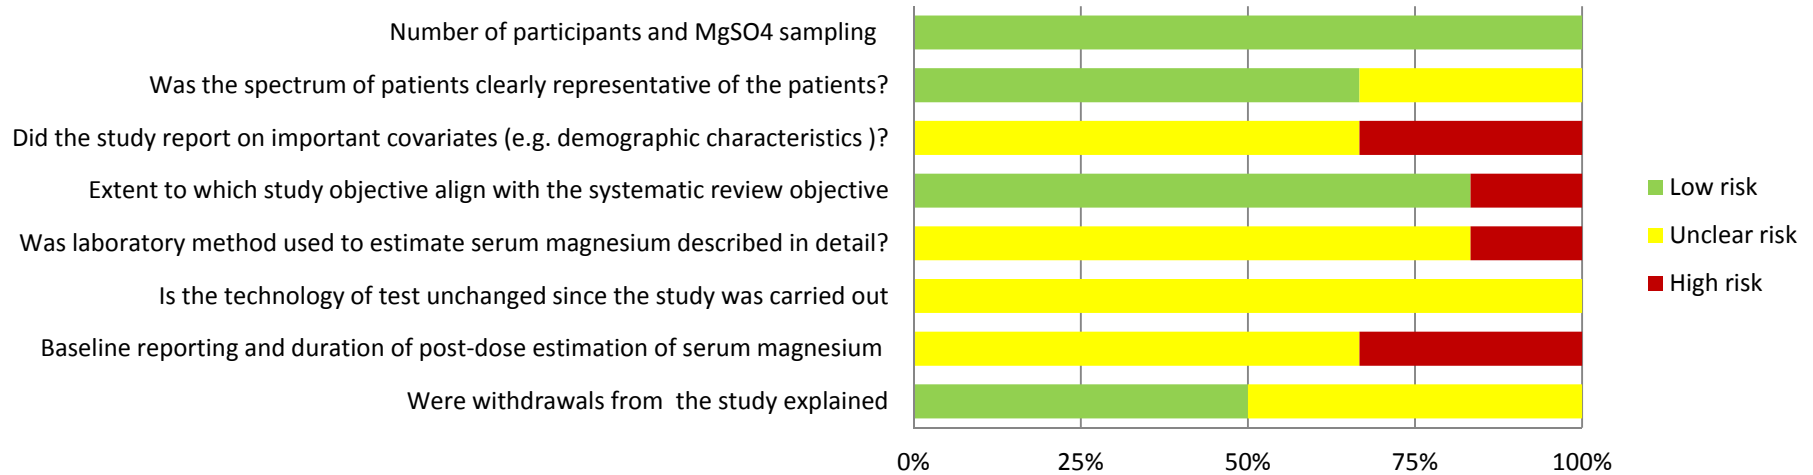

**Figure S2.** Risk of bias assessment for intravenous regimens
