# Supplementary material for: Clinical pharmacokinetic properties of magnesium sulphate in women with pre‐eclampsia and eclampsia
Source: PubMed Central journal article supplement (PMC4737322; doi:10.1111/1471-0528.13753), 2015-11-24
Supplement: BJO-123-356-s003.pdf [file BJO-123-356-s003.pdf]

**Figure S3.1 4g (IV) + 10 g IM loading + 5g 4 hrly maintenance**

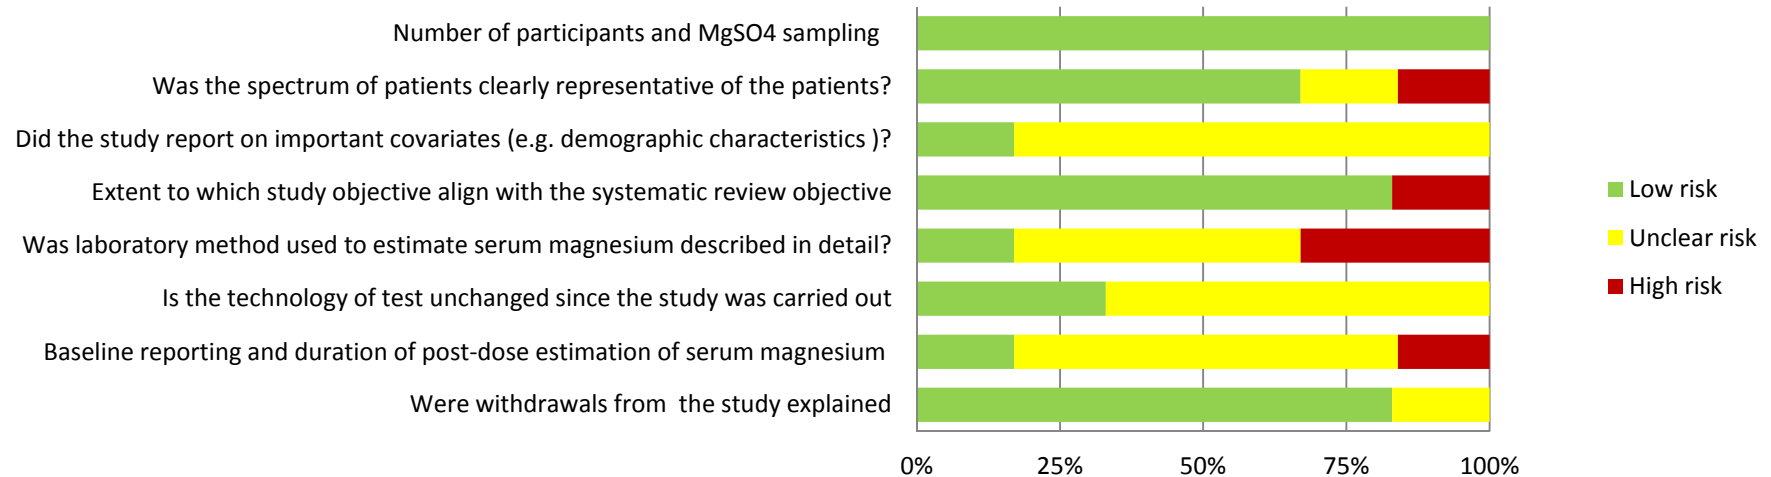

**Figure S3.2 3g (IV) loading + 10g (IM) maintenance**

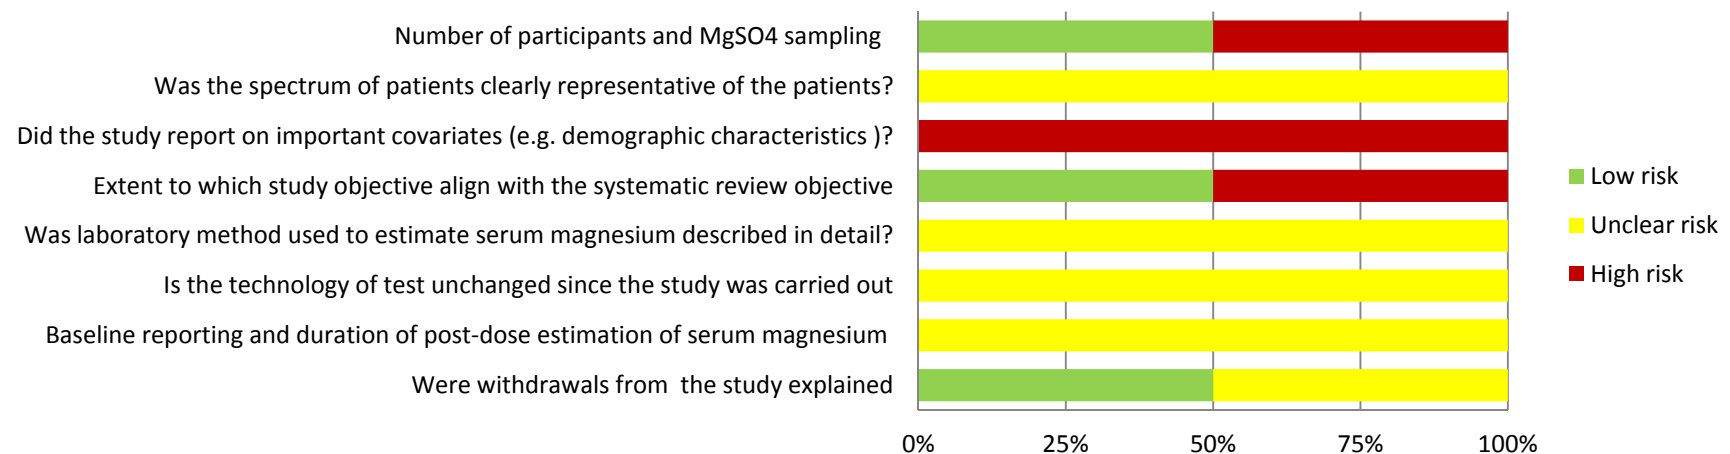

**Figure S3.3 10 g loading + 5 g (4hrly) maintenance**

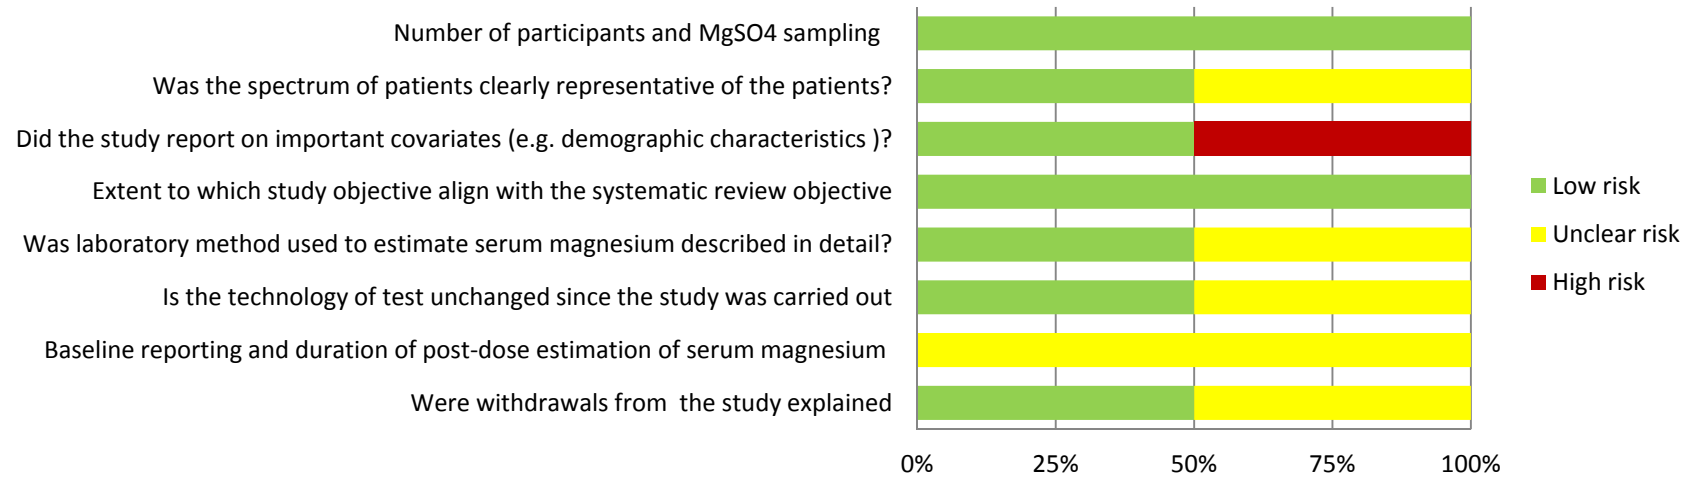

**Figure S3.4 10g loading dose only**

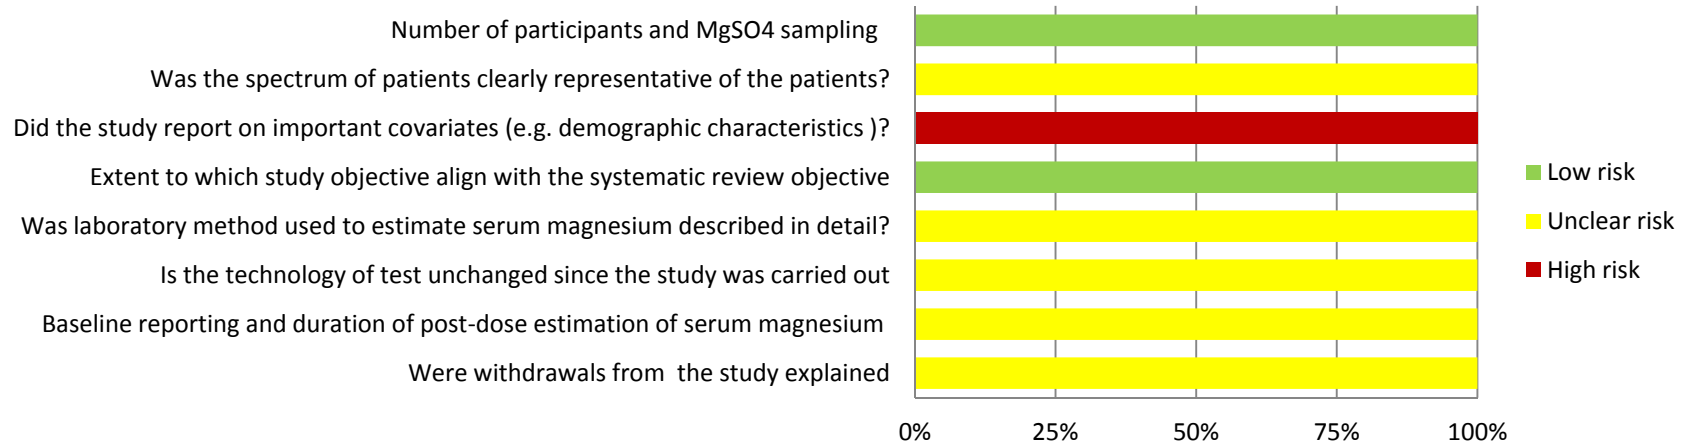

**Figure S3.5 12g (2g IV, 10g IM) loading dose only**

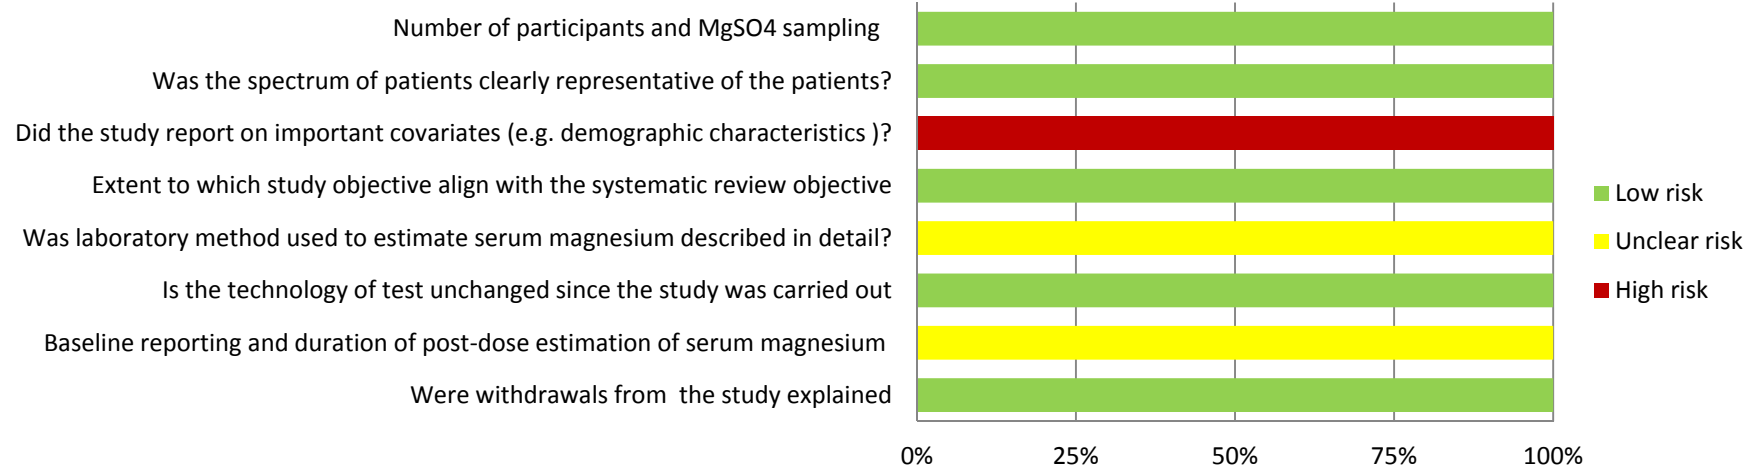

**Figure S3.6 4g IV and 4g IM loading dose only**

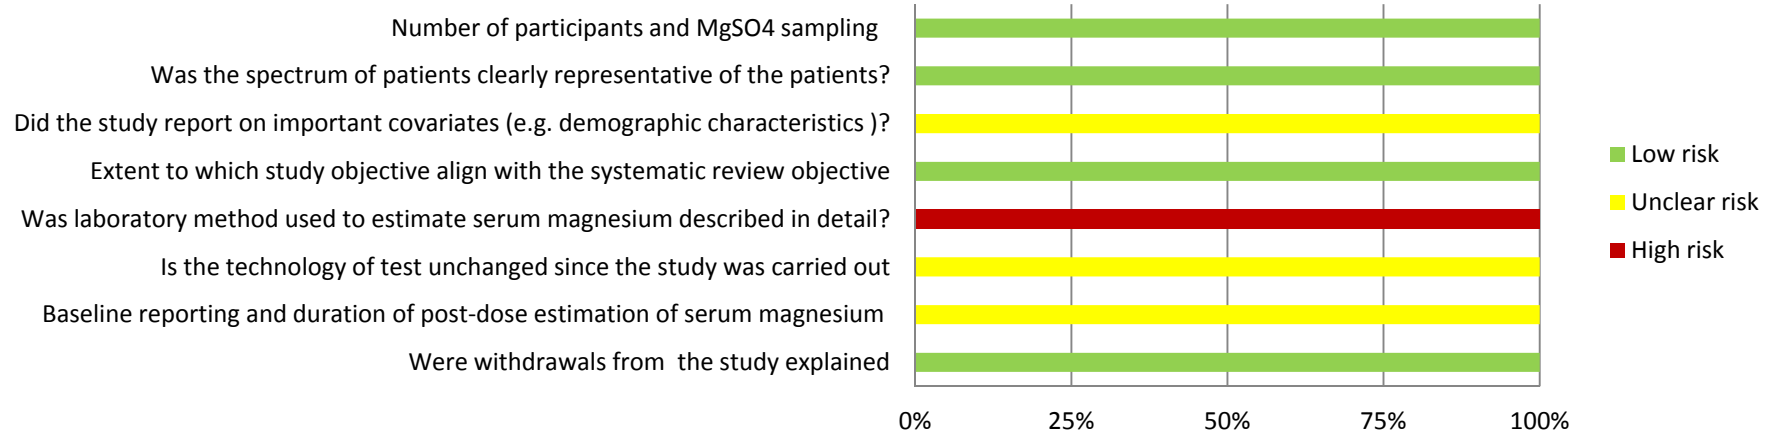

**Figure S3.** Risk of bias assessment for intramuscular regimens
