# Supplementary material for: Clinical pharmacokinetic properties of magnesium sulphate in women with pre‐eclampsia and eclampsia
Source: PubMed Central journal article supplement (PMC4737322; doi:10.1111/1471-0528.13753), 2015-11-24
Supplement: BJO-123-356-s004.pdf [file BJO-123-356-s004.pdf]

**Table S1.** Checklist for risk of bias assessment and explanations

| Study | Domain of assessment                                                                                                       | Criteria                       | Risk of bias | Explanation                                                                                                                                                                             |
|-------|----------------------------------------------------------------------------------------------------------------------------|--------------------------------|--------------|-----------------------------------------------------------------------------------------------------------------------------------------------------------------------------------------|
|       | <b>Number of participants and MgSO<sub>4</sub> sampling</b>                                                                | ≥10 or dense sampling in ≥5    | Low          | ≥10 women treated with MgSO <sub>4</sub> for preeclampsia and/or eclampsia with serum magnesium concentration measured against time <b>OR</b> ≥5 women with dense sampling per subject. |
|       |                                                                                                                            | <10 or sparse sampling in ≥5-9 | High         | <10 women treated with MgSO <sub>4</sub> for preeclampsia and/or eclampsia with serum magnesium concentration measured against time <b>OR</b> <5 women with dense sampling per subject. |
|       |                                                                                                                            | Unclear                        | Unclear      | Number of participants with serum magnesium estimation was not reported.                                                                                                                |
|       | <b>Was the spectrum of patients clearly representative of the patients who will receive the test in practice?</b>          | Yes                            | Low          | The study used criteria that are accepted to define preeclampsia or eclampsia or made reference to the criteria.                                                                        |
|       |                                                                                                                            | No                             | High         | The study did not use criteria that are accepted to define preeclampsia or eclampsia or make reference to the criteria.                                                                 |
|       |                                                                                                                            | Unsure                         | Unclear      | Study reported use of MgSO <sub>4</sub> for women with “toxaemia”, “preeclampsia” and / or “eclampsia” without any reference to clear criteria for selecting study participants.        |
|       | <b>Did the study report on important covariates (e.g. demographic characteristics - maternal age, gestation age, race,</b> | Yes                            | Low          | Details of relevant covariates were provided in the report for all women or as a range.                                                                                                 |
|       |                                                                                                                            | No                             | High         | No report of relevant covariates provided in the report.                                                                                                                                |
|       |                                                                                                                            | Unclear                        | Unclear      | Covariate sparsely reported for women or described as arithmetic mean or                                                                                                                |

body weight or body mass index)?

percentages.

|                                                                                    |                       |         |                                                                                                                                                                                                                                                          |
|------------------------------------------------------------------------------------|-----------------------|---------|----------------------------------------------------------------------------------------------------------------------------------------------------------------------------------------------------------------------------------------------------------|
| <b>Extent to which study objective align with the systematic review objective</b>  | Yes                   | Low     | The primary objective of the study was to assess serum level magnesium concentrations or pharmacokinetic properties of MgSO <sub>4</sub> in women with preeclampsia and/ or eclampsia. It covers Absorption, Distribution, Metabolism, Excretion (ADME). |
|                                                                                    | No                    | High    | The primary objective of the study was not to assess serum magnesium level or pharmacokinetic properties of MgSO <sub>4</sub> in preeclampsia and/or eclampsia but serum Mg concentration was assessed as part of the study components.                  |
|                                                                                    | Uncertain             | Unclear | The study objective was not clearly reported and does not fall into any of the above categories.                                                                                                                                                         |
| <b>Was laboratory method used to estimate serum magnesium described in detail?</b> | Yes                   | Low     | Sample collection explained including storage conditions of samples prior to estimation of serum magnesium. The equipment, model, manufacturer and peculiarities of laboratory method described.                                                         |
|                                                                                    | No                    | High    | No description of method of serum magnesium estimation.                                                                                                                                                                                                  |
|                                                                                    | Unclear               | Unclear | Partial description of the storage conditions of samples prior to estimation of serum magnesium, the equipment, model, manufacturer and or the peculiarities of laboratory method.                                                                       |
| <b>Is the technology of test unchanged since the study was carried out</b>         | No                    | Low     | Method and equipment used to estimate serum magnesium concentration have not changed since study was conducted.                                                                                                                                          |
|                                                                                    | Yes                   | High    | Method and equipment used to estimate serum magnesium have changed since study was conducted.                                                                                                                                                            |
|                                                                                    | Unsure                | Unclear | Unable to ascertain if technique and equipment used to estimate serum magnesium have not changed since study was conducted                                                                                                                               |
| <b>Baseline reporting and</b>                                                      | Baseline reported and | Low     | Baseline and post-dose serial serum magnesium concentration reported against time for up to 24 hours (i.e. sampling covers absorption phase,                                                                                                             |

|                                                            |                                                         |         |                                                                                                                                                                                                                           |
|------------------------------------------------------------|---------------------------------------------------------|---------|---------------------------------------------------------------------------------------------------------------------------------------------------------------------------------------------------------------------------|
| <b>duration of post-dose estimation of serum magnesium</b> | post-dose estimation $\geq 24$ hours                    |         | maximum concentration region and elimination phase).                                                                                                                                                                      |
|                                                            | No baseline reported or post-dose estimation < 24 hours | High    | Baseline not reported or post-dose serial serum magnesium concentration reported against time for less than 24 hours (i.e. sampling does not cover absorption phase, maximum concentration region and elimination phase). |
|                                                            | Unreported or unclear reporting                         | Unclear | Baseline serum magnesium was not reported and post-dose serial measurement was not performed up to 24 hours OR baseline serum magnesium was reported but post-dose serial measurement was not performed up to 24 hours.   |
| Were withdrawals from the study explained                  | Yes/ No withdrawals                                     | Low     | Less than 20% withdrawal or explanation suggests that withdrawals would not bias the study findings                                                                                                                       |
|                                                            | No                                                      | High    | More than 20% withdrawal or explanation suggests that withdrawals would bias the study findings.                                                                                                                          |
|                                                            | Unclear                                                 | Unclear | No explanation provided for withdrawals.                                                                                                                                                                                  |

---
